# Supplementary material
Source: PubMed Central journal article supplement (PMC2654718)
Supplement: NIHMS92498-supplement-1_si_001.pdf [file NIHMS92498-supplement-1_si_001.pdf]

## Supplementary material

# Quantification of the Vitamin D Receptor - Coregulator Interaction

Arnaud Teichert<sup>‡§</sup>, Leggy A. Arnold<sup>‡||</sup>, Steve Otieno<sup>‡</sup>, Yuko Oda<sup>§</sup>, Indre Augustinaite<sup>||</sup>, Tim R. Geistlinger<sup>⊥</sup>, Richard W Kriwacki<sup>‡</sup>, R. Kiplin Guy<sup>||</sup>  
and Daniel D. Bikle<sup>§\*</sup>

|                                                                                     |    |
|-------------------------------------------------------------------------------------|----|
| VDR-coactivator binding isotherms<br>SRC1-1, SRC1-2, SRC1-3, SRC2-1, SRC2-2, SRC2-3 | S2 |
| VDR-coactivator binding isotherms<br>SRC3-1, SRC3-2, SRC3-3, DRIP1, DRIP2, P300     | S3 |
| VDR-coactivator binding isotherms<br>RIP140-5, NCoR, SMRT, Hr-1, Hr-2               | S4 |
| ITC binding isotherms of SRC2-3 and SRC2-3Tx                                        | S5 |
| FP binding study with VDRwt, MBP, Hr-1wt, and Hr-1 C/S                              | S6 |

VDR-coactivator binding isotherms in the presence and absence of  $1\alpha,25(\text{OH})_2\text{D}_3$ . ■  $1\alpha,25(\text{OH})_2\text{D}_3$ ; ▲ no ligand.

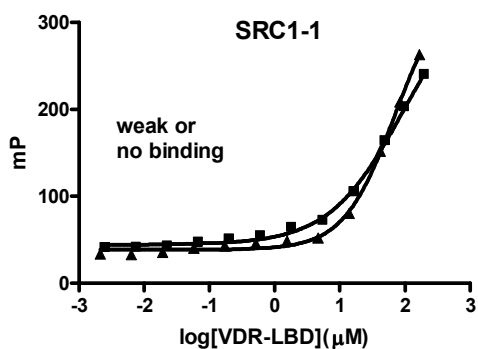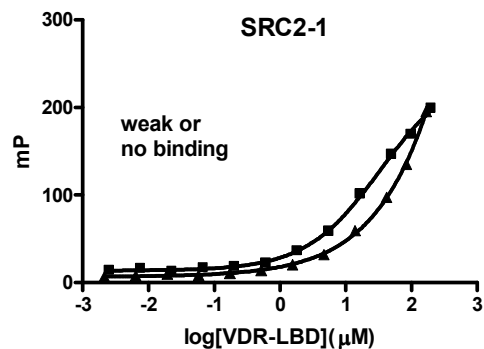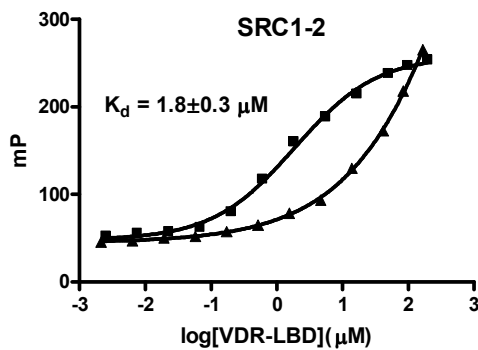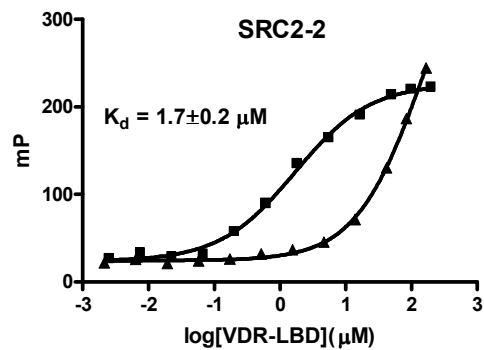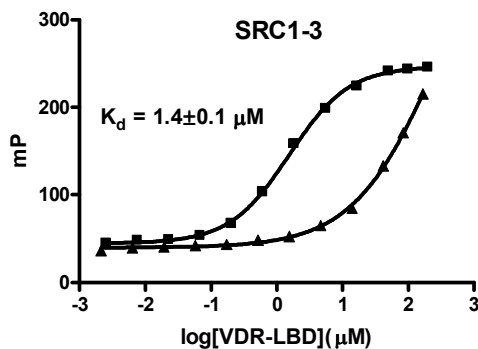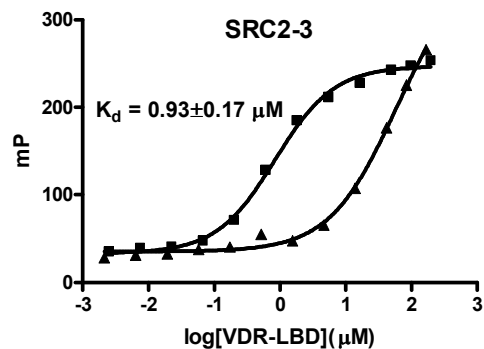

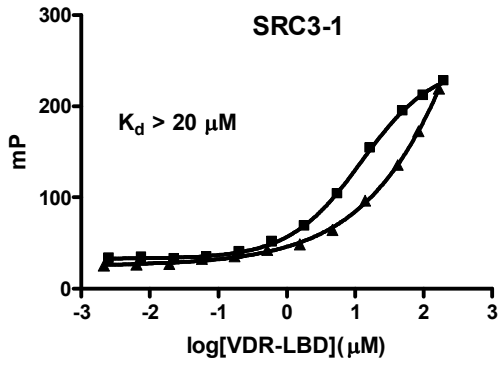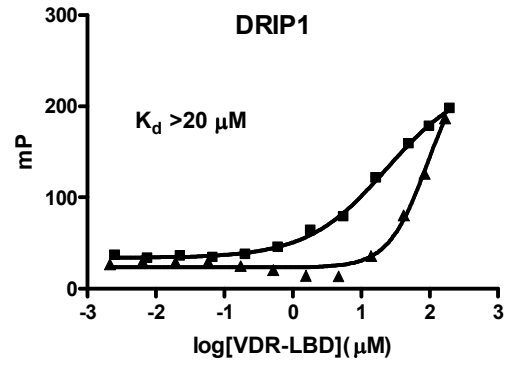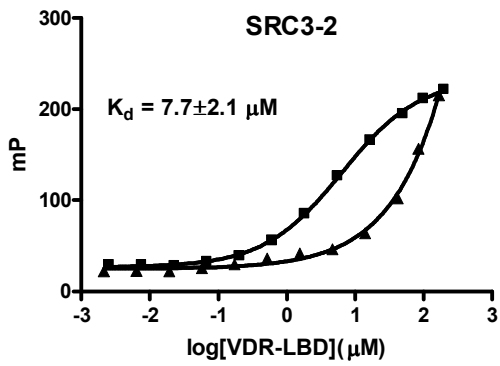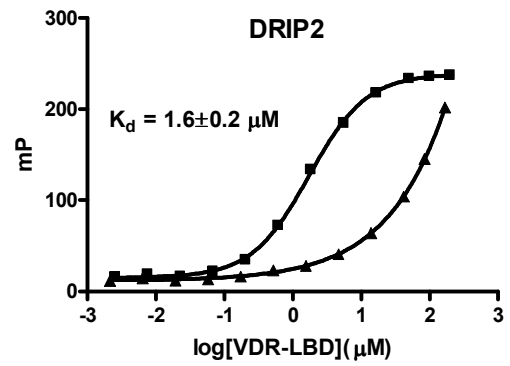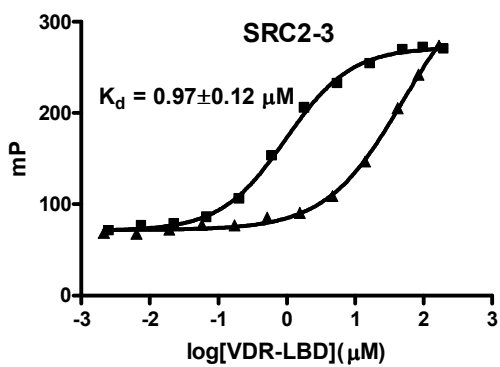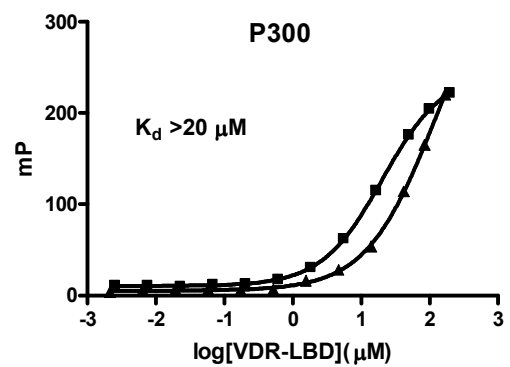

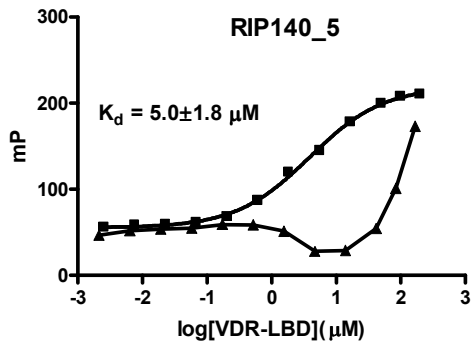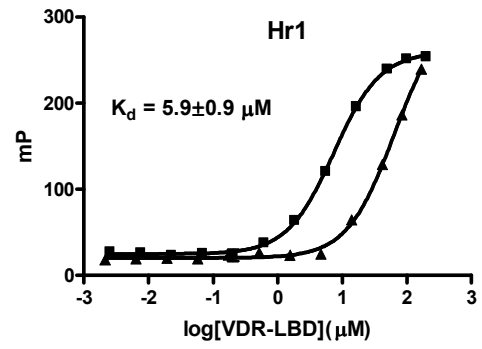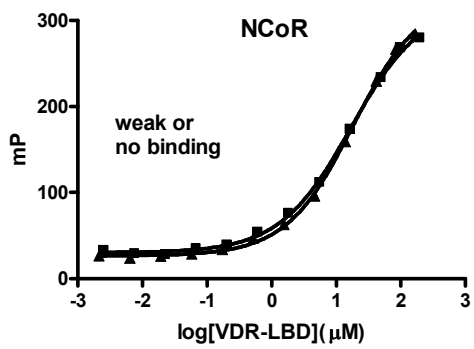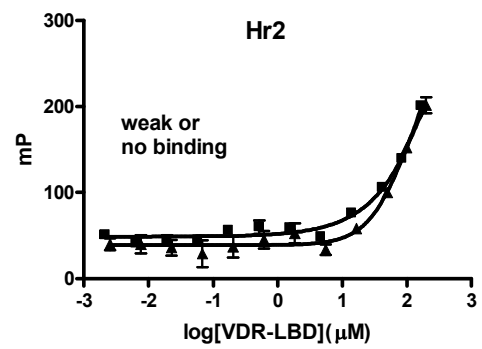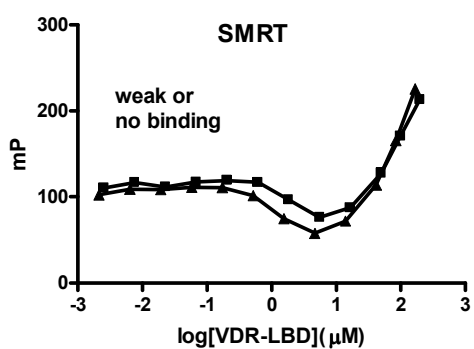

ITC binding isotherms:

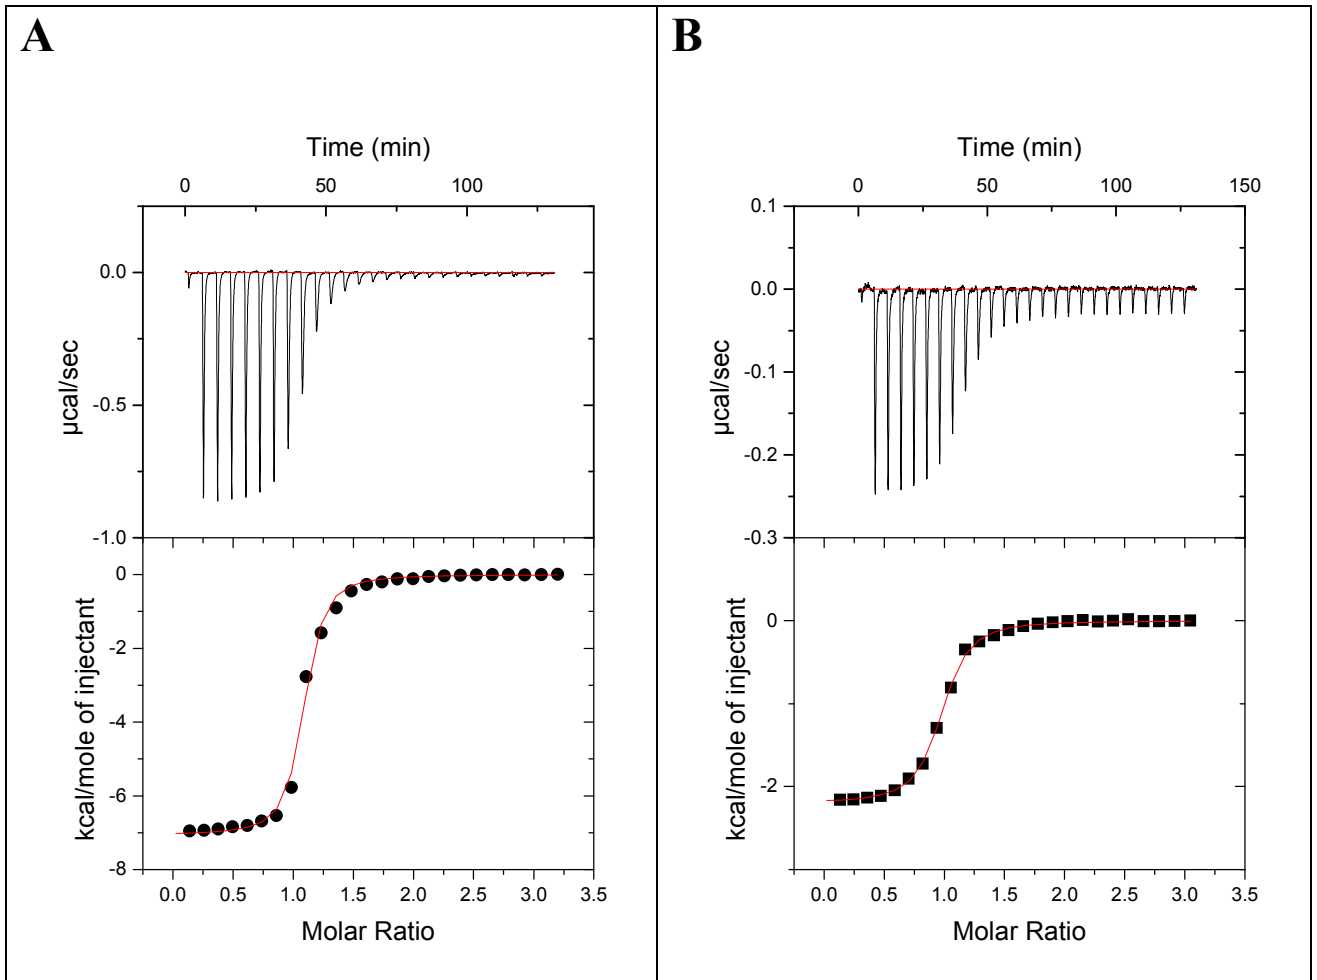

**A** unlabeled SRC2-3 peptide ( $K_d = 174 \pm 37$ ); **B** Texas Red labeled SRC2-3 peptide ( $K_d = 285 \pm 18$ );

Fluorescence polarization binding isotherms:

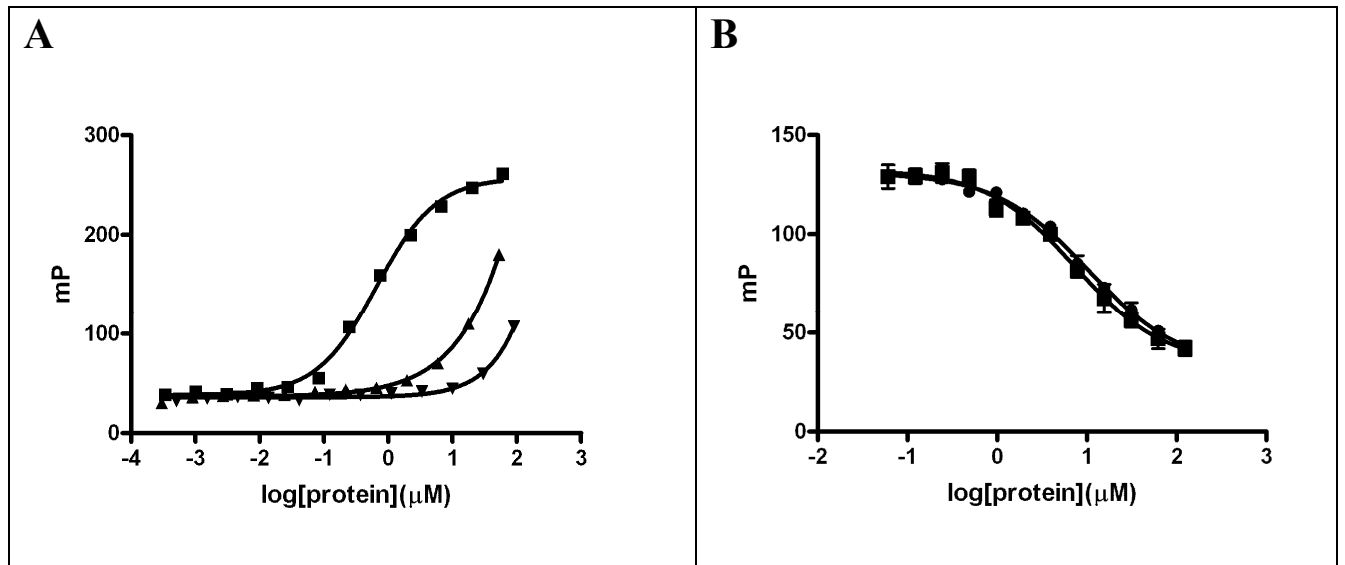

**A.** FP Binding isotherms of SRC2-3 Texas-Red and  $\blacksquare$ VDRwt + 1 $\alpha$ ,25(OH)<sub>2</sub>D<sub>3</sub> (0.75 $\pm$ 0.10  $\mu$ M) or  $\blacktriangle$ VDRwt or  $\blacktriangledown$ MBP (maltose-binding protein); **B.** Competition fluorescence polarization assay with SRC2-3 Texas-Red, VDRwt (1.5  $\mu$ M) and increasing amount of  $\blacksquare$  Hr-1 wt (10.5 $\pm$ 2.9  $\mu$ M) and Hr-1 C/S exchanged (7.4 $\pm$ 2.7  $\mu$ M).
